# Supplementary material
Source: Research Square preprint supplement (doi:10.21203/rs.3.rs-9907438/v1)
Supplement: Supplementary file 1 [file 56fb9eb4cbce962c960a772c.xlsx]

## Sheet: Sheet1
Trait	SNP	CHROM	POS	REF	ALT	Effect	SE	AC.FarmCPU		SNP	CHROM	POS	REF	ALT	Effect	SE	AC.MLM		SNP	CHROM	POS	REF	ALT	Effect	SE	AC.GLM
AC	9-998402	9	998402	C	A	-0.569993	0.143187	0.000139935		9-998402	9	998402	C	A	-0.569999	0.154554	0.000388387		9-998402	9	998402	C	A	-0.569993	0.143187	0.000139935
	7-57574447	7	57574447	T	A,C	1.22369	0.307611	0.000141301		7-57574447	7	57574447	T	A,C	1.22369	0.331986	0.000391112		7-57574447	7	57574447	T	A,C	1.22369	0.307611	0.000141301
	4-4567597	4	4567597	G	T	1.43846	0.366566	0.00017111		4-4567597	4	4567597	G	T	1.43847	0.394809	0.000451774		4-4567597	4	4567597	G	T	1.43846	0.366566	0.00017111
	4-51737616	4	51737616	G	T	1.43846	0.366566	0.00017111		4-51737616	4	51737616	G	T	1.43847	0.394809	0.000451774		4-51737616	4	51737616	G	T	1.43846	0.366566	0.00017111
ADF	SNP	CHROM	POS	REF	ALT	Effect	SE	ADF.FarmCPU		SNP	CHROM	POS	REF	ALT	Effect	SE	ADF.MLM		SNP	CHROM	POS	REF	ALT	Effect	SE	ADF.GLM
	2-73694022	2	73694022	T	C	3.0407	0.776521	0.000176232		2-73694022	2	73694022	T	C	3.03262	0.844692	0.000540383		2-73694022	2	73694022	T	C	3.0407	0.776521	0.000176232
	4-62405674	4	62405674	T	A	-3.19817	0.825743	0.000204844		9-1970899	9	1970899	A	T	3.54506	0.995643	0.000596597		4-62405674	4	62405674	T	A	-3.19817	0.825743	0.000204844
	9-1970899	9	1970899	A	T	3.51289	0.919005	0.000244458		4-62405674	4	62405674	T	A	-3.173	0.894324	0.000622199		9-1970899	9	1970899	A	T	3.51289	0.919005	0.000244458
	1-75823652	1	75823652	C	T	3.92025	1.03459	0.000274438		9-1970986	9	1970986	G	T	3.8639	1.10627	0.000746756		1-75823652	1	75823652	C	T	3.92025	1.03459	0.000274438
ADL	SNP	CHROM	POS	REF	ALT	Effect	SE	ADL.FarmCPU		SNP	CHROM	POS	REF	ALT	Effect	SE	ADL.MLM		SNP	CHROM	POS	REF	ALT	Effect	SE	ADL.GLM
	3-58776650	3	58776650	G	A	0.188639	0.0466364	0.000111194		3-58776650	3	58776650	G	A	0.188641	0.0504607	0.00032698		3-58776650	3	58776650	G	A	0.188639	0.0466364	0.000111194
	10-53107887	10	53107887	C	A	-0.117292	0.0295614	0.000146577		10-53107887	10	53107887	C	A	-0.1173	0.0318918	0.000401806		10-53107887	10	53107887	C	A	-0.117292	0.0295614	0.000146577
	4-66989693	4	66989693	T	C	-0.106262	0.0270012	0.000164401		4-66989693	4	66989693	T	C	-0.106264	0.0290939	0.00043824		4-66989693	4	66989693	T	C	-0.106262	0.0270012	0.000164401
	8-56623235	8	56623235	A	G	0.195069	0.0514242	0.000270525		8-56623235	8	56623235	A	G	0.195068	0.0551174	0.000640655		8-56623235	8	56623235	A	G	0.195069	0.0514242	0.000270525
CP	SNP	CHROM	POS	REF	ALT	Effect	SE	CP.FarmCPU		SNP	CHROM	POS	REF	ALT	Effect	SE	CP.MLM		SNP	CHROM	POS	REF	ALT	Effect	SE	CP.GLM
	1-71114067	1	71114067	G	C	-1.29244	0.329076	0.000169112		1-71114067	1	71114067	G	C	-1.29247	0.35448	0.000447766		1-71114067	1	71114067	G	C	-1.29244	0.329076	0.000169112
	2-6379225	2	6379225	C	G	1.75705	0.460281	0.000248882		2-6379225	2	6379225	C	G	1.75705	0.493769	0.000600825		2-6379225	2	6379225	C	G	1.75705	0.460281	0.000248882
	1-19407855	1	19407855	C	G	2.0496	0.540548	0.000272028		1-19407855	1	19407855	C	G	2.04961	0.579327	0.000643234		1-19407855	1	19407855	C	G	2.0496	0.540548	0.000272028
	1-19407859	1	19407859	A	G	2.0496	0.540548	0.000272028		1-19407859	1	19407859	A	G	2.04961	0.579327	0.000643234		1-19407859	1	19407859	A	G	2.0496	0.540548	0.000272028
ME	SNP	CHROM	POS	REF	ALT	Effect	SE	ME.FarmCPU		SNP	CHROM	POS	REF	ALT	Effect	SE	ME.MLM		SNP	CHROM	POS	REF	ALT	Effect	SE	ME.GLM
	4-40568569	4	40568569	A	T	0.286334	0.0521725	3.78377e-07		4-40568569	4	40568569	A	T	0.286333	0.0600235	7.15066e-06		4-40568569	4	40568569	A	T	0.286334	0.0521725	3.78377e-07
	6-53874807	6	53874807	C	T	0.231026	0.0469691	3.96094e-06		6-53874807	6	53874807	C	T	0.231025	0.0526757	3.16057e-05		6-53874807	6	53874807	C	T	0.231026	0.0469691	3.96094e-06
	6-45147206	6	45147206	A	G	-0.148623	0.031668	9.68767e-06		6-45147206	6	45147206	A	G	-0.14863	0.0351747	5.7526e-05		6-45147206	6	45147206	A	G	-0.148623	0.031668	9.68767e-06
	6-53872220	6	53872220	G	C	0.20314	0.0432917	9.71888e-06		6-53872220	6	53872220	G	C	0.203138	0.0480827	5.76773e-05		6-53872220	6	53872220	G	C	0.20314	0.0432917	9.71888e-06
NDF	SNP	CHROM	POS	REF	ALT	Effect	SE	NDF.FarmCPU		SNP	CHROM	POS	REF	ALT	Effect	SE	NDF.MLM		SNP	CHROM	POS	REF	ALT	Effect	SE	NDF.GLM
	3-73231302	3	73231302	C	T	-1.22949	0.283855	3.87808e-05		8-5886412	8	5886412	T	C	2.79335	0.710747	0.000167504		3-73231302	3	73231302	C	T	-1.22949	0.283855	3.87808e-05
	1-7960217	1	7960217	A	G	1.1544	0.272659	5.57704e-05		1-7960217	1	7960217	A	G	1.27292	0.327117	0.000192109		1-7960217	1	7960217	A	G	1.1544	0.272659	5.57704e-05
	1-10489994	1	10489994	T	C,G	1.29277	0.307401	6.19293e-05		2-63179993	2	63179993	C	A	-1.50058	0.389475	0.000219911		1-10489994	1	10489994	T	C,G	1.29277	0.307401	6.19293e-05
	4-40568569	4	40568569	A	T	-2.4612	0.585898	6.30273e-05		3-73231302	3	73231302	C	T	-1.24769	0.324691	0.00022782		4-40568569	4	40568569	A	T	-2.4612	0.585898	6.30273e-05
IVODM	SNP	CHROM	POS	REF	ALT	Effect	SE	IVOMD.FarmCPU		SNP	CHROM	POS	REF	ALT	Effect	SE	IVOMD.MLM		SNP	CHROM	POS	REF	ALT	Effect	SE	IVOMD.GLM
	10-962187	10	962187	C	T	-0.590842	0.15496	0.000252788		10-962187	10	962187	C	T	-0.59085	0.166211	0.000608108		10-962187	10	962187	C	T	-0.590842	0.15496	0.000252788
	10-10167746	10	10167746	C	G	0.777145	0.204691	0.000267397		10-10167746	10	10167746	C	G	0.777153	0.219419	0.000634868		10-10167746	10	10167746	C	G	0.777145	0.204691	0.000267397
	10-1906754	10	1906754	C	T	-0.652742	0.175939	0.000360299		10-1906754	10	1906754	C	T	-0.652743	0.188006	0.000799577		10-1906754	10	1906754	C	T	-0.652742	0.175939	0.000360299
	2-2598675	2	2598675	G	A	0.685573	0.187269	0.000425885		2-2598675	2	2598675	G	A	0.685578	0.199759	0.000910813		2-2598675	2	2598675	G	A	0.685573	0.187269	0.000425885
